# Supplementary material for: Generation of propulsive force via vertical undulations in snakes
Source: Oxford University Press journal article supplement (doi:10.1242/jeb.239020), 2021-06-21
Supplement: jeb239020supp.pdf [file jeb239020supp.pdf]

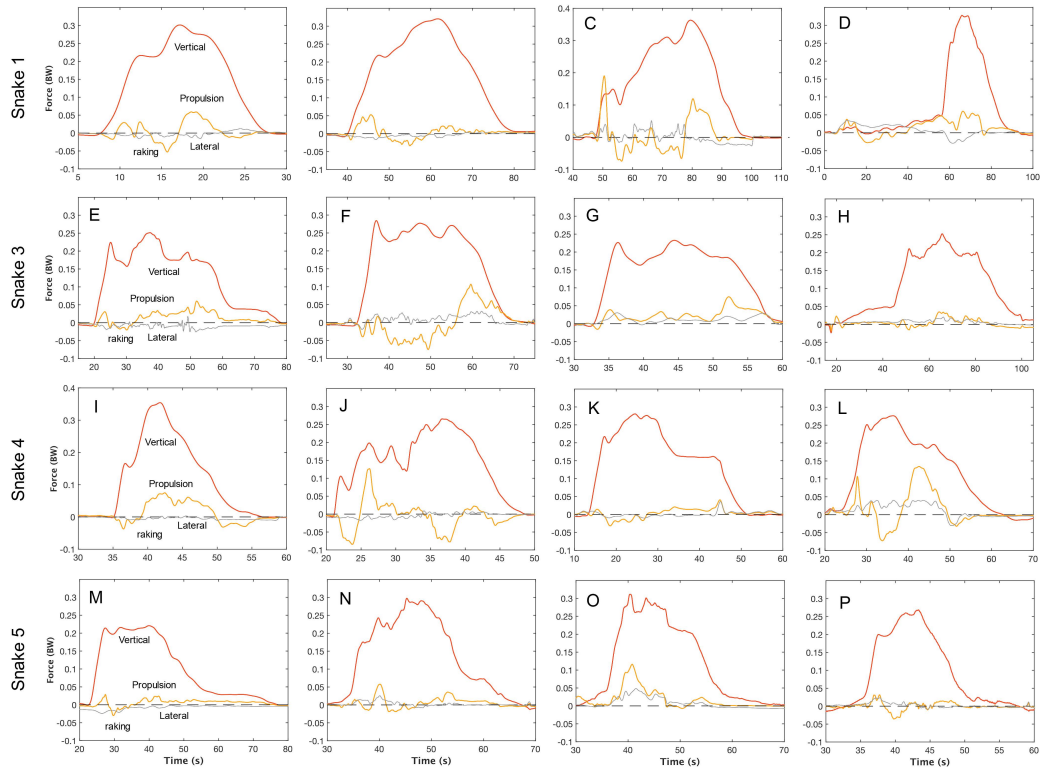

**Fig. S1.** All trials we obtained showing the forces (BW) as the snake passed along the force-sensing dowel. Trials involving snake 1 are represented by A-D, snake 3 E-H, snake 4 I-L, and snake 5 M-P. Snakes 2 and 6 were not included as they would not cooperate.

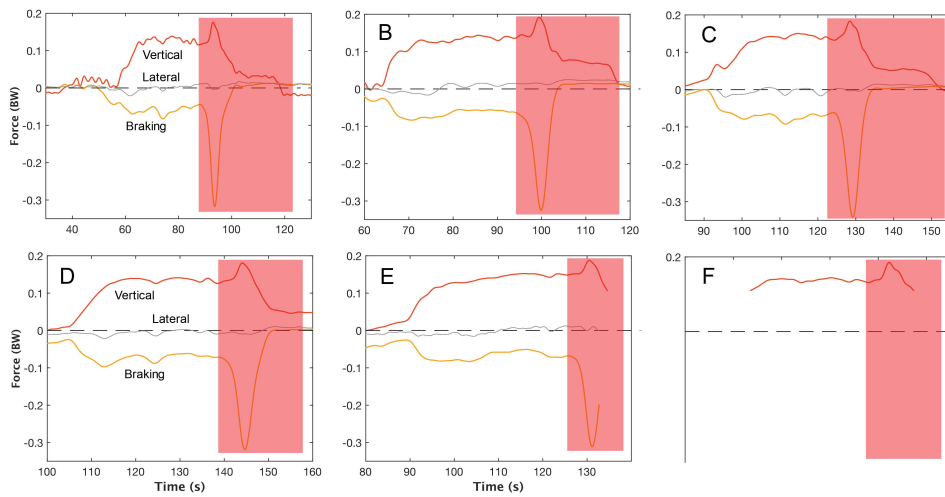

**Figure S2.** All trials obtained from the inert nylon rope dragged across the force-sensing dowel. The red region shows when the rope fell off the dowel adjacent to the force-sensing dowel, generating substantial forces due to inertial motion. This region was excluded from our analysis.

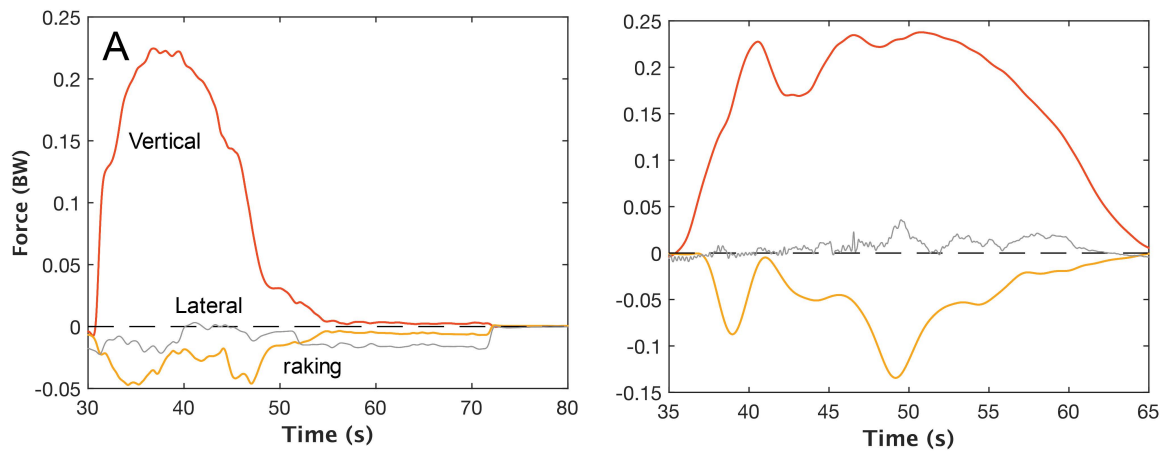

**Fig. S3.** All trials obtained that have purely braking force (or nearly so). Trials are from snake 4 (A) and snake 3 (B).

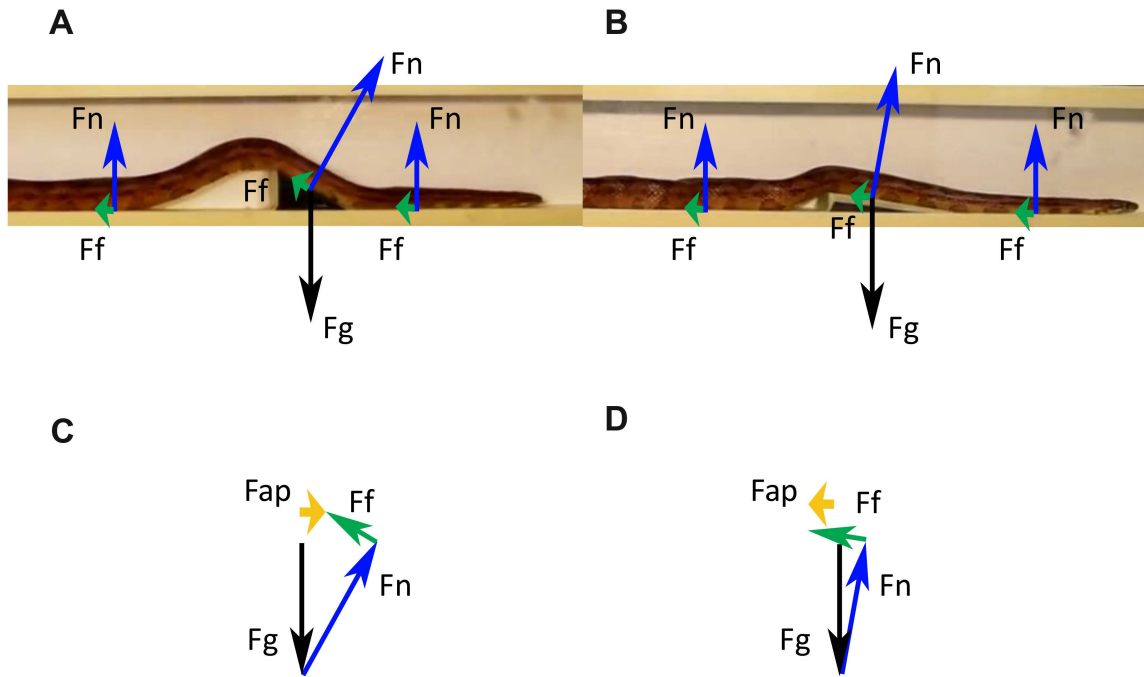

**Fig. S4.** A) Reaction forces for the corn snake vertically undulating against the 33 wedge at 30°.  $F_{ap}$ -anteroposterior force,  $F_f$ -frictional force,  $F_g$ -gravitational force,  $F_n$ -normal force. B) Reaction forces for the corn snake using concertina against the wedge at 10°. C) Body diagram summarizing the forces from A showing a net propulsive force. D) Body diagram summarizing the forces from B showing a net braking force.

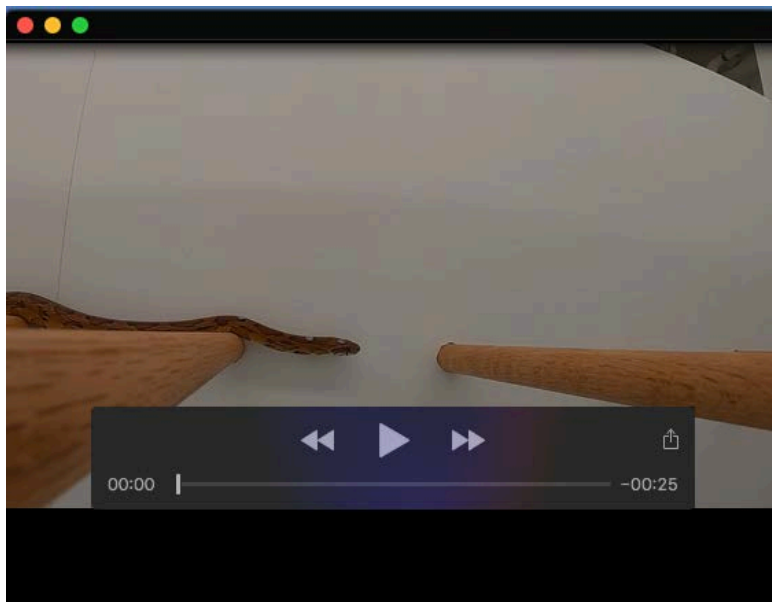

**Movie 1.** Corn snake performing vertical undulations in lateral view across the force-sensing dowel.

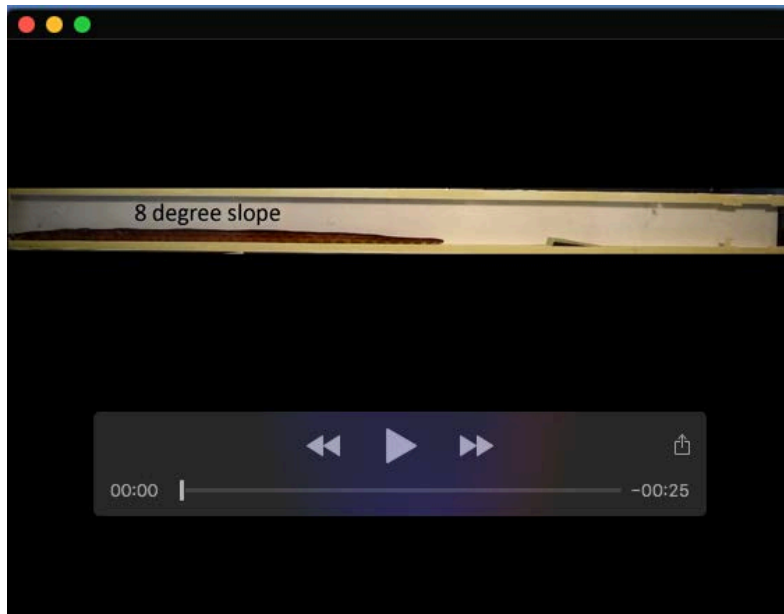

**Movie 2.** Corn snake in lateral view within a tunnel made of PVC boards showing two trials. In the first trial both prior to and while crossing the wedge (sloped at  $8^\circ$ ) the corn snake performs concertina locomotion. Following this trial, prior to the wedge (sloped at  $30^\circ$ ), the corn snake performs concertina locomotion and transitions to vertical undulations after encountering the wedge.

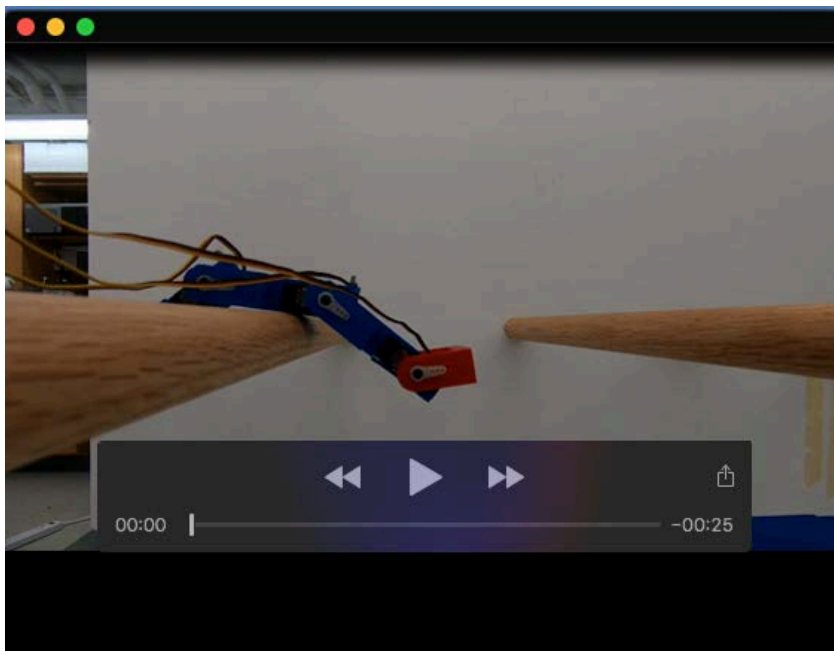

**Movie 3.** Snake robot performing vertical undulation in lateral view.

Supplementary Materials and Methods 1. Code used to control the snake robot in the software Python.

#Code for the software Python used to control the snake robot.

```
import serial
```

```
import sys
```

```
import time
```

```
import math
```

```
import numpy
```

```
import scipy
```

```
#variables
```

```
x=scipy.arange(0, 35, 1) #time interval for robot, 35 seconds total
```

```
a=600 #amplitude
```

```
#t=x #'time'
```

```
d=0 #phase shift
```

```
z=1450 #translation up/down to 'zero' servo motors
```

```
z1=1500
```

```
z2=1475
```

```
z3=1425
```

```
#Motor0
```

```
d0=17.5
```

```
#Motor1
```

```
d=16
```

#Motor2

d1=14.5

#Motor3

d2=13

#Motor4

d3=11.5

#Motor5

d4=10

#Motor6

d5=8.5

#Motor7

d6=7

#Motor8

d7=5.5

#Motor9

d8=4

#Motor10

d9=2.5

#Motor11

d10=1

#equations separated by motor

$y = (a * (\text{numpy.sin}(x + d_0))) + z_1$

```
y1=((a*(numpy.sin(x+d)))+z3)
y2=((a*(numpy.sin(x+d1)))+z2)
y3=((a*(numpy.sin(x+d2)))+z)
y4=((a*(numpy.sin(x+d3)))+z)
y5=((a*(numpy.sin(x+d4)))+z)
y6=((a*(numpy.sin(x+d5)))+z1)
y7=((a*(numpy.sin(x+d6)))+z1)
y8=((a*(numpy.sin(x+d7)))+z1)
y9=((a*(numpy.sin(x+d8)))+z1)
y10=((a*(numpy.sin(x+d9)))+z1)
y11=((a*(numpy.sin(x+d10)))+z)
```

```
#to read lynxmotion
```

```
ssc32 = serial.Serial('/dev/cu.usbserial-A10731HN', 9600, timeout=1.0)
```

```
#servo motors information
```

```
sin=str(y)
```

```
#motor 0
```

```
motor='#0 P'
```

```
extra='T600 \r'
```

```
#motor 1
```



motor1='#1 P'

#motor 2

motor2='#2 P'

#motor 3

motor3='#3 P'

#motor 4

motor4='#4 P'

#motor 5

motor5='#5 P'

#motor 6

motor6='#6 P'

#motor 7

motor7='#7 P'

#motor 8

motor8='#8 P'

#motor 9

motor9='#9 P'

#motor 10

motor10='#10 P'

#motor 11

motor11='#11 P'

print("start")

```
#delay before running, and motor delay prior to next position
```

```
time.sleep(2)
```

```
r = y.shape
```

```
for robot in range(0,r[0]):
```

```
    #motor0
```

```
    final=motor+str(y[robot])+'+'+extra
```

```
    ssc32.write(bytes(final, 'ASCII'))
```

```
    time.sleep(.05)
```

```
    #motor1
```

```
    final=motor1+str(y1[robot])+'+'+extra
```

```
    ssc32.write(bytes(final, 'ASCII'))
```

```
    time.sleep(.05)
```

```
    #motor2
```

```
    final=motor2+str(y2[robot])+'+'+extra
```

```
    ssc32.write(bytes(final, 'ASCII'))
```

```
    time.sleep(.05)
```

```
    #motor3
```

```
    final=motor3+str(y3[robot])+'+'+extra
```

```
ssc32.write(bytes(final, 'ASCII'))
```

```
time.sleep(.05)
```

```
#motor4
```

```
final=motor4+str(y4[robot])+'+'+extra
```

```
ssc32.write(bytes(final, 'ASCII'))
```

```
time.sleep(.05)
```

```
#motor5
```

```
final=motor5+str(y5[robot])+'+'+extra
```

```
ssc32.write(bytes(final, 'ASCII'))
```

```
time.sleep(.05)
```

```
#motor6
```

```
final=motor6+str(y6[robot])+'+'+extra
```

```
ssc32.write(bytes(final, 'ASCII'))
```

```
time.sleep(.05)
```

```
#motor7
```

```
final=motor7+str(y7[robot])+'+'+extra
```

```
ssc32.write(bytes(final, 'ASCII'))
```

```
time.sleep(.05)
```

```
#motor8
```

```
final=motor8+str(y8[robot])+'+extra
```

```
ssc32.write(bytes(final, 'ASCII'))
```

```
time.sleep(.05)
```

```
#motor9
```

```
final=motor9+str(y9[robot])+'+extra
```

```
ssc32.write(bytes(final, 'ASCII'))
```

```
time.sleep(.05)
```

```
#motor10
```

```
final=motor10+str(y10[robot])+'+extra
```

```
ssc32.write(bytes(final, 'ASCII'))
```

```
time.sleep(.05)
```

```
#motor11
```

```
final=motor11+str(y11[robot])+'+extra
```

```
ssc32.write(bytes(final, 'ASCII'))
```

```
time.sleep(.05)
```

```
time.sleep(2)
```

```
#return robot to flat position
```

```
ssc32.write(bytes('#0 P1500 T500 #1 P1425 T500 #2 P1475 T500 #3 P1450 T500 #4 P1450  
T500 #5 P1450 T500 #6 P1500 T500 #7 P1500 T500 #8 P1500 T500 #9 P1500 T500 #10 P1500  
T500 #11 P1450 T500 \r', 'ASCII'))
```

```
print("end")
```

```
ssc32.close()
```
